# Supplementary material for: Supplements enhance antioxidant activity and improve the quality of whole-plant corn silage by altering secondary metabolic pathways and phenolic metabolite composition
Source: Research Square preprint supplement (doi:10.21203/rs.3.rs-6588463/v1), 2025-05-29
Supplement: Supplementary file 1 [file 51d24527662402225ddb8a8c.xlsx]

## Sheet: Sheet1
Tab.1 pH values, chemical composition and cultivable microbial population of WCS
Items	Treatment				P-Value
	CK	LB	M	LB+ME
DM(%)	37.60±0.53	37.31±0.10	38.09±0.54	37.15±0.39	0.381082
WSC(%DM)	1.03±0.03	1.09±0.11	1.07±0.03	1.05±0.03	0.337642
CP(%DM)	8.18±0.39a	6.42±0.08b	6.35±0.39b	6.46±0.06b	0.00621633
ST(%DM)	31.08±1.09	34.10±1.61	36.42±3.31	31.98±2.07	0.663978
NDF(%DM)	38.45±0.85a	38.63±1.15a	32.27±1.17Bb	32.99±2.45Ab	0.00315314
ADF(%DM)	19.97±0.63a	18.99±0.49Aab	16.20±1.34Ab	17.15±1.68Aab	0.303595
LAB(log10 CFU/g)	4.11±0.03b	4.31±0.01ab	4.68±0.15a	4.36±0.21ab	0.240625
Yeast(log10 CFU/g)	0.8±0.08	1.63±0.33	2.48±0.31	1.69±0.21	0.768193
pH	3.77±0.04	3.7±0.02	3.7±0.01	3.76±0.06	0.0382464
NH3-N(%TN)	0.52±0.1b	0.37±0.02b	0.39±0.04b	0.99±0.04a	0.000546057
Note: Dry matter (DM); Water soluble carbohydrate (WSC); Crude protein (CP); Starch (ST); Neutral detergent fiber (NDF); Acid detergent fiber (ADF). lowercase letters indicate differences among treatments.
